# Supplementary material for: The Gut Microbiome Profile in Obesity: A Systematic Review
Source: PubMed Central journal article supplement (PMC5933040; doi:10.1155/2018/4095789), 2018-03-22
Supplement: 4095789.f1.pdf [file 4095789.f1.pdf]

N=570 records indentified through Pubmed/MEDLINE , and screened with title and/or abstract

N=487 records excluded

N=83 full text articles assessed for eligibility

N=68 excluded

N=46 clinicat trials assessing dietary interventions, animal based trials.

N=22 relevant reviews read but not systematic (not included)

N=15 studies included for synthesis

N=11 microbiota diversity in obese subjects

N=4 changes in microbiota after Bariatric surgery
